# Supplementary material for: Lipid residues in pottery from the Indus Civilisation in northwest India
Source: PubMed Central journal article supplement — J Archaeol Sci. 2021 Jan;125:105291. doi: 10.1016/j.jas.2020.105291 (PMC7829615; doi:10.1016/j.jas.2020.105291), 2021-01
Supplement: mmc3.pdf [file mmc3.pdf]

## Supplementary Information 3

Suryanarayan et al.

Table S.1: Details of all analysed vessels from Alamgirpur. Vessel fragments marked with \* had lipid concentrations lower than 5 µg/g and were excluded from analysis.

| <i>S.No.</i> | <i>Sample No.</i> | <i>Trench/Context</i> | <i>Rim/Base/Body</i> | <i>Rim diam</i> | <i>Vessel form</i> | <i>Image (Front)</i>                                                                  | <i>Image (Back)</i>                                                                   |
|--------------|-------------------|-----------------------|----------------------|-----------------|--------------------|---------------------------------------------------------------------------------------|---------------------------------------------------------------------------------------|
| 1            | ALM<br>114-252    | SC-114                | rim                  | 30              | large jar          |    |    |
| 2            | ALM<br>117-275    | SC-117                | rim/<br>neck         | NA              | jar                |    |    |
| 3            | ALM<br>117-276    | SC-117                | rim/<br>neck         | NA              | jar                |    |    |
| 4            | ALM<br>117-279    | SC-117                | rim                  | 12              | small jar          |   |   |
| 5            | ALM<br>119-363    | SC-119                | rim                  | 15              | dish               |  |  |
| 6            | ALM<br>119-370    | SC-119                | rim                  | 10              | small jar          |  |  |
| 7            | ALM<br>121-387    | SC-121                | rim                  | 10              | small necked jar   |  |  |

|    |                 |        |      |    |                  |
|----|-----------------|--------|------|----|------------------|
| 8  | ALM<br>122-397  | SC-122 | rim  | 12 | small jar        |
| 9  | ALM<br>124-460  | SC-124 | rim  | 12 | small necked jar |
| 10 | ALM<br>125-475  | SC-125 | rim  | 10 | small necked jar |
| 11 | ALM<br>125-479  | SC-125 | rim  | 13 | medium jar       |
| 12 | ALM<br>125-481  | SC-125 | rim  | 20 | necked jar       |
| 13 | ALM<br>126-491  | SC-125 | rim  | 10 | small jar        |
| 14 | ALM<br>126-494  | SC-125 | rim  | 20 | dish             |
| 15 | ALM<br>121-385* | SC-121 | body |    | jar?             |

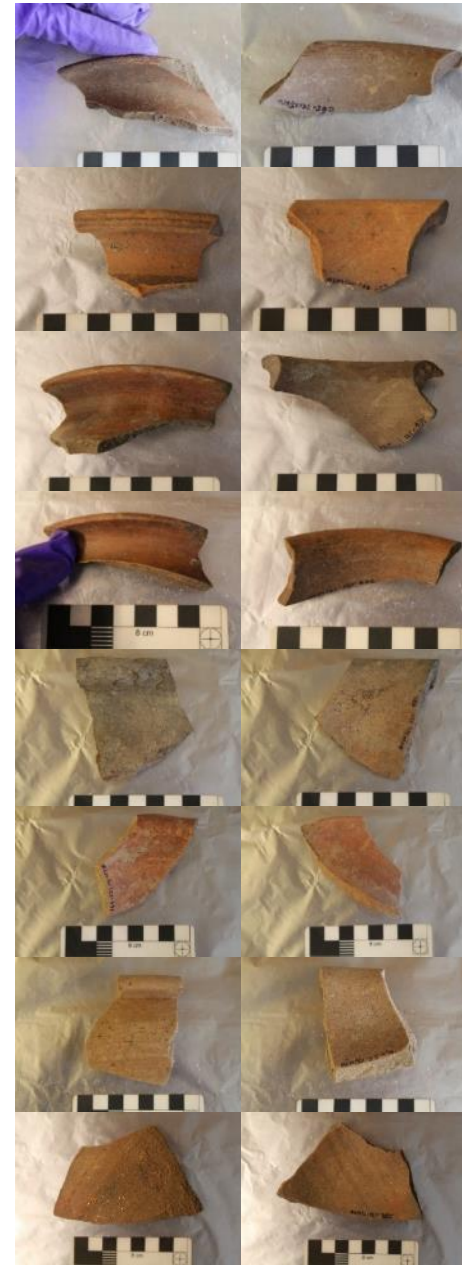

Table S.2: List of analysed samples from Alamgirpur with lipid concentrations  $<5 \mu\text{g/g}$ . Details of the vessel fragments, chronological period, lipid concentration, lipid composition, P/S ratio and  $\delta^{13}\text{C}$  values of the  $\text{C}_{18:0}$ , and  $\text{C}_{16:0}$  fatty acids for every sample are provided. FAs: saturated fatty acids, UFAs: unsaturated fatty acids, Br: branched-chain fatty acids, Diacids: dicarboxylic acids. Fatty acids in bold reflect the compound with the highest abundance within the lipid abstract.

| S.No. | Sample ID  | Rim/<br>Base/<br>Body | Vessel<br>form   | Rim<br>size<br>(cm) | Chrono<br>logical<br>period | During<br>or post-<br>4.2 ka | Lipid<br>concentra<br>tion<br>( $\mu\text{g/g}$ ) | Lipid composition                        |                           |                 |         | P/S ratio<br>( $C_{16:0}/C_{18:0}$ ) | $\delta^{13}\text{C}$<br>$C_{16:0}$ | $\delta^{13}\text{C}$<br>$C_{18:0}$ | $\Delta^{13}\text{C}$<br>( $C_{18:0}$<br>-<br>$C_{16:0}$ ) |
|-------|------------|-----------------------|------------------|---------------------|-----------------------------|------------------------------|---------------------------------------------------|------------------------------------------|---------------------------|-----------------|---------|--------------------------------------|-------------------------------------|-------------------------------------|------------------------------------------------------------|
|       |            |                       |                  |                     |                             |                              |                                                   | FAs                                      | UFAs                      | Br              | Diacids |                                      |                                     |                                     |                                                            |
| 1     | ALM114-252 | rim                   | large jar        | 30                  | LH                          | Post 4.2 ka                  | 8.5                                               | C14-C18;<br><b>C16</b>                   | 16:1,<br>C18:1,<br>C22:1  | C15Br,<br>C17Br | Present | 2.4                                  | -29.0                               | -28.7                               | 0.3                                                        |
| 2     | ALM117-275 | rim                   | jar              | NA                  | LH                          | Post 4.2 ka                  | 11.1                                              | C14-C24;<br><b>C16</b>                   | 16:1,<br>C18:1,<br>C22:1  |                 |         | 1.8                                  | -29.0                               | -29.0                               | 0.0                                                        |
| 3     | ALM117-276 | rim                   | jar              | NA                  | LH                          | Post 4.2 ka                  | 6.9                                               | C16-18,<br>C20; <b>C16</b>               | 16:1,<br>C18:1,<br>C22:1  |                 | Present | 1.2                                  |                                     |                                     |                                                            |
| 4     | ALM117-279 | rim                   | small jar        | 12                  | LH                          | Post 4.2 ka                  | 9.9                                               | C14-C18,<br>C20, C22;<br><b>C16</b>      | 16:1,<br>C18:1,<br>C22:1  | C15Br,<br>C17Br |         | 1.5                                  | -28.9                               | -29.4                               | -0.5                                                       |
| 5     | ALM119-363 | rim                   | dish             | 15                  | LMH                         | During                       | 6.7                                               | C16, C18;<br><b>C16</b>                  | C18:1,<br>C22:1           |                 |         | 1.1                                  |                                     |                                     |                                                            |
| 6     | ALM119-370 | rim                   | small jar        | 10                  | LMH                         | During                       | 25.1                                              | C14-C18,<br>C20, C22,<br>C24; <b>C16</b> | 16:1,<br>C18:1,<br>C22:1  | C15Br,<br>C17Br |         | 2.1                                  | -27.8                               | -28.6                               | -0.7                                                       |
| 7     | ALM121-387 | rim                   | small necked jar | 10                  | LMH                         | During                       | 5.1                                               | C16, C18;<br><b>C16</b>                  | C18:1                     |                 |         | 1.2                                  |                                     |                                     |                                                            |
| 8     | ALM122-397 | rim                   | small jar        | 12                  | LMH                         | During                       | 15.2                                              | C12-C18,<br>C20, C22,<br>C24; <b>C16</b> | 16:1,<br>C18:1,<br>C22:1  | C15Br,<br>C17Br |         | 2.6                                  | -28.5                               | -28.6                               | -0.1                                                       |
| 9     | ALM124-460 | rim                   | small necked jar | 12                  | LMH                         | During                       | 23.8                                              | C12-C18,<br>C20, C22,<br>C24; <b>C16</b> | 16:1,<br>C18:1,<br>C22:1  | C15Br,<br>C17Br | Present | 1.8                                  | -28.0                               | -28.0                               | 0.0                                                        |
| 10    | ALM125-475 | rim                   | small necked jar | 10                  | LMH                         | During                       | 26.3                                              | C14-C18,<br>C20, C22,<br>C24; <b>C16</b> | 16:1,<br>C18:1,<br>C22:1  | C15Br,<br>C17Br |         | 2.1                                  | -27.8                               | -28.0                               | -0.1                                                       |
| 11    | ALM125-479 | rim                   | Medium jar       | 13                  | LMH                         | During                       | 42.4                                              | C12-C18,<br>C20, C22;<br><b>C16</b>      | 16:1,<br>C18:1,<br>C22:1  | C15Br,<br>C17Br |         | 2.1                                  |                                     |                                     |                                                            |
| 12    | ALM125-481 | rim                   | necked jar       | 20                  | LMH                         | During                       | 11.9                                              | C12, C14,<br>C16, C18<br>C20; <b>C16</b> | C16:1,<br>C18:1,<br>C22:1 |                 |         | 1.6                                  | -29.5                               | -29.8                               | -0.3                                                       |

|    |            |     |           |    |     |        |      |                          |              |         |     |       |       |      |
|----|------------|-----|-----------|----|-----|--------|------|--------------------------|--------------|---------|-----|-------|-------|------|
| 13 | ALM125-494 | rim | dish      | 20 | LMH | During | 9.5  | C14-C18, C20; <b>C16</b> | C18:1, C22:1 | Present | 1.7 | -28.7 | -28.3 | 0.4  |
| 14 | ALM126-491 | rim | small jar | 10 | LMH | During | 13.2 | C14-C18; <b>C16</b>      | C16:1, C18:1 | Present | 1.5 | -28.9 | -29.2 | -0.3 |

Table S.3: Details of all analysed vessels from Masudpur VII. Vessel fragments marked with \* had lipid concentrations lower than 5  $\mu\text{g/g}$  and were excluded from analysis. Photos with blue background courtesy Danika Parikh.

| <i>S.No.</i> | <i>Sample No.</i> | <i>Trench/Context</i> | <i>Rim/Base/Body</i> | <i>Rim diam</i> | <i>Vessel form</i> | <i>Image (Exterior)</i>                                                               | <i>Image (Interior)</i>                                                               |
|--------------|-------------------|-----------------------|----------------------|-----------------|--------------------|---------------------------------------------------------------------------------------|---------------------------------------------------------------------------------------|
| 1            | MSD<br>1788       | YA2-401               | body                 | NA              | perforated vessel  |    |    |
| 2            | MSD<br>1799       | YA2-401               | body                 | NA              | perforated vessel  |    |    |
| 3            | MSD<br>1800       | YA2-402               | rim                  | 12              | ledged jar         |    |    |
| 4            | MSD<br>1873       | YA2-402               | body                 | NA              | perforated vessel  |    |    |
| 5            | MSD<br>2115       | YA2-407               | rim                  | 13              | medium jar         |   |   |
| 6            | MSD<br>2116       | YA2-407               | rim                  | 12              | small jar          |  |  |
| 7            | MSD<br>2209       | YA2-418               | rim                  | 27              | bowl               |  |  |

|    |              |         |      |    |                   |
|----|--------------|---------|------|----|-------------------|
| 8  | MSD<br>2211  | YA2-418 | rim  | NA | jar               |
| 9  | MSD<br>3392  | YB1-513 | rim  | 15 | bowl              |
| 10 | MSD<br>3402  | YB1-513 | rim  | NA | jar               |
| 11 | MSD<br>3412A | YB1-513 | rim  | 15 | necked jar        |
| 12 | MSD<br>3458  | YB1-513 | body | NA | perforated vessel |
| 13 | MSD<br>3576  | YB1-515 | rim  | NA | jar               |
| 14 | MSD<br>3585  | YB1-515 | rim  | NA | ledged jar        |
| 15 | MSD<br>3586  | YB1-515 | rim  | 8  | ledged jar        |

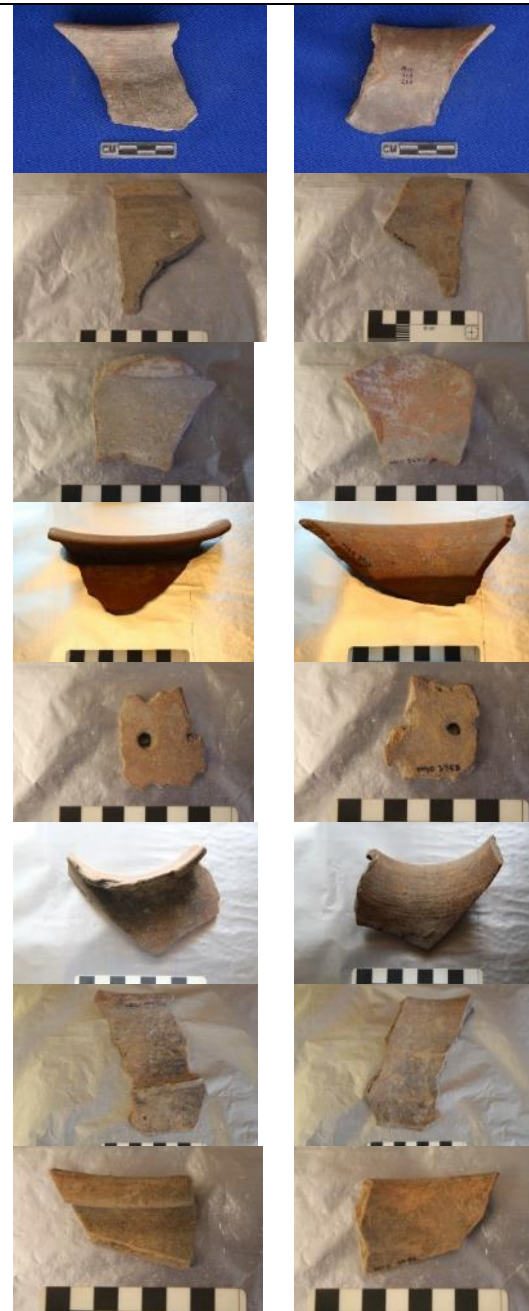

|    |             |         |     |     |            |
|----|-------------|---------|-----|-----|------------|
| 16 | MSD<br>3587 | YB1-515 | rim | 9   | small jar  |
| 17 | MSD<br>3590 | YB1-515 | rim | NA  | jar        |
| 18 | MSD<br>3602 | YB1-515 | rim | NA  | jar        |
| 19 | MSD<br>3603 | YB1-515 | rim | NA  | jar        |
| 20 | MSD<br>3788 | YB1-517 | rim | NA  | jar        |
| 21 | MSD<br>3794 | YB1-517 | rim | NA  | jar        |
| 22 | MSD<br>3795 | YB1-517 | rim | NA  | jar        |
| 23 | MSD<br>3809 | YB1-517 | rim | 8.5 | ledged jar |

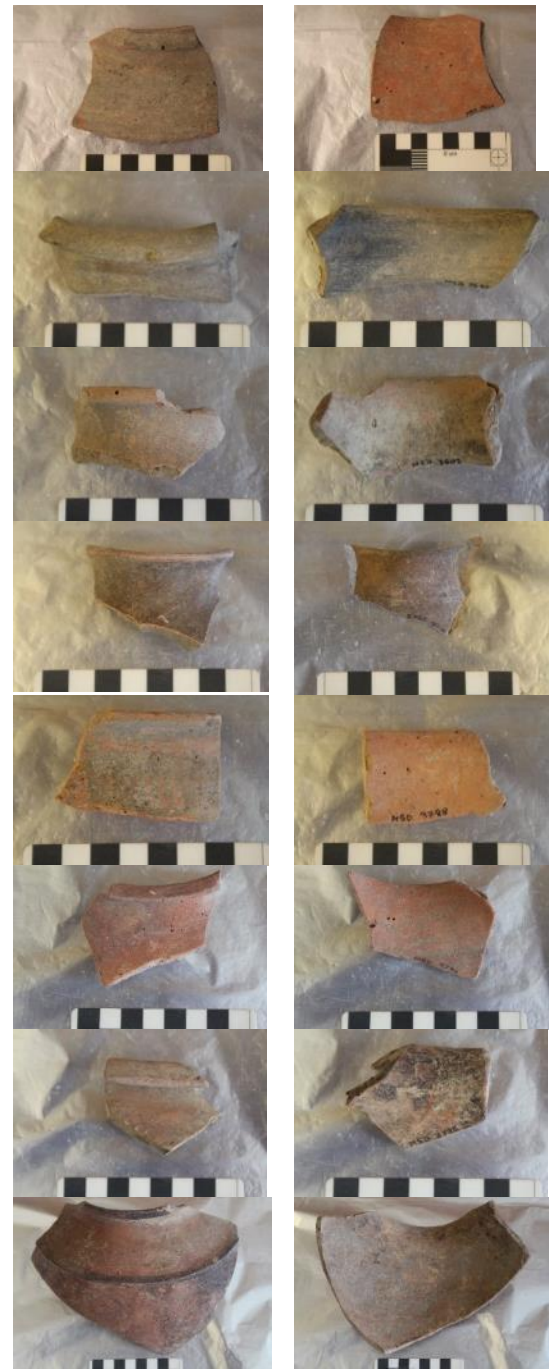



|    |              |         |      |    |                   |                                                                                      |
|----|--------------|---------|------|----|-------------------|--------------------------------------------------------------------------------------|
| 24 | MSD<br>3810  | YB1-517 | rim  | 10 | ledged jar        |    |
| 25 | MSD<br>3813  | YB1-517 | rim  | 8  | small jar         |   |
| 26 | MSD<br>3816  | YB1-517 | rim  | 8  | necked jar        |   |
| 27 | MSD<br>3845  | YB1-517 | body | NA | perforated vessel |   |
| 28 | MSD<br>3846  | YB1-517 | body | NA | perforated vessel |   |
| 29 | MSD<br>3410* | YB1-513 | rim  |    | ledged jar        |  |

Table S.4: List of analysed samples from Masdupur VII with lipid concentrations <5 µg/g. Details of the vessel fragments, chronological period, lipid concentration, lipid composition, P/S ratio and δ<sup>13</sup>C values of the C<sub>18:0</sub>, anission to scientific reportsd C<sub>16:0</sub> fatty acids for every sample are provided. FAs: saturated fatty acids, UFAs: unsaturated fatty acids, Br: branched-chain fatty acids, Diacids: dicarboxylic acids. Fatty acids in bold reflect the compound with the highest abundance within the lipid abstract

| S.No. | Sample ID | Rim/<br>Base/<br>Body | Vessel<br>shape       | Rim<br>size<br>(cm) | Chrono<br>logical<br>period | Before,<br>during<br>or post-<br>4.2 ka | Lipid<br>concent<br>ration<br>(µg/g) | Lipid composition                                       |                            |                 |         | P/S<br>ratio<br>(C18:<br>0-<br>C16:0) | δ <sup>13</sup> C<br>C <sub>16:0</sub> | δ <sup>13</sup> C<br>C <sub>18:0</sub> | Δ <sup>13</sup> C<br>(C <sub>18:0</sub> -<br>C <sub>16:0</sub> ) |      |
|-------|-----------|-----------------------|-----------------------|---------------------|-----------------------------|-----------------------------------------|--------------------------------------|---------------------------------------------------------|----------------------------|-----------------|---------|---------------------------------------|----------------------------------------|----------------------------------------|------------------------------------------------------------------|------|
|       |           |                       |                       |                     |                             |                                         |                                      | FAs                                                     | UFAs                       | Br              | Diacids |                                       |                                        |                                        |                                                                  |      |
| 1     | MSD1788   | body                  | perforate<br>d vessel | NA                  | LH                          | Post-4.2<br>ka                          | 23.8                                 | C15-C18, C20,<br>C22, C24; <b>C16, C18</b>              | C16:1,<br>C18:1,<br>C22:1  |                 |         |                                       | 0.7                                    | -26.7                                  | -27.3                                                            | -0.6 |
| 2     | MSD1799   | body                  | perforate<br>d vessel | NA                  | LH                          | Post-4.2<br>ka                          | 16.0                                 | C14-C18, C20,<br>C22, C24; <b>C16</b>                   | C16:1,<br>C18:1,<br>C22:1  | C15Br,<br>C17Br | Present | 1.2                                   | -28.2                                  | -28.6                                  | -0.4                                                             |      |
| 3     | MSD1800   | rim                   | ledged<br>jar         | 12                  | LH                          | Post-4.2<br>ka                          | 12.5                                 | C14-C18, C20,<br>C22, C24; <b>C16</b>                   | C16:1,<br>C18:1,<br>C22:1  | C15Br,<br>C17Br | Present | 1.5                                   |                                        |                                        |                                                                  |      |
| 4     | MSD1873   | body                  | perforate<br>d vessel | NA                  | LH                          | Post-4.2<br>ka                          | 17.4                                 | C14-C18, C20,<br>C22, C24; <b>C16</b>                   | C16:1,<br>C18:1,<br>C22:1  | C15Br,<br>C17Br | Present | 1.7                                   | -29.0                                  | -28.5                                  | 0.5                                                              |      |
| 5     | MSD2115   | rim                   | medium<br>jar         | 13                  | EMH                         | Before                                  | 23.5                                 | C12, C14-C18,<br>C20, C22,<br>C24; <b>C16</b>           | C16:1,<br>C18:1,<br>C22:1  | C15Br,<br>C17Br |         | 1.8                                   | -26.7                                  | -25.6                                  | 1.1                                                              |      |
| 6     | MSD2116   | rim                   | small jar             | 12                  | EMH                         | Before                                  | 39.6                                 | C12, C14-C18,<br>C20, C22,<br>C24, C26; <b>C16, C18</b> | C16:1,<br>C18:1,<br>C22:1  | C15Br,<br>C17Br |         | 1.3                                   | -27.9                                  | -28.3                                  | -0.4                                                             |      |
| 7     | MSD2209   | rim                   | large<br>bowl         | 27                  | EMH                         | Before                                  | 17.0                                 | C14-C18, C22,<br>C24, C26; <b>C16</b>                   | C16:1,<br>C18:1,<br>C22:1  | C15Br,<br>C17Br | Present | 2.4                                   | -29.0                                  | -28.7                                  | 0.3                                                              |      |
| 8     | MSD2211   | rim                   | jar                   | NA                  | EMH                         | Before                                  | 6.2                                  | C14-C18; <b>C16</b>                                     | C16:1,<br>C18:1,<br>C22:1  |                 |         | 1.3                                   |                                        |                                        |                                                                  |      |
| 9     | MSD3392   | rim                   | bowl                  | 15                  | LH                          | Post-4.2<br>ka                          | 11.6                                 | C14-18; C20,<br>C22, C24; <b>C16</b>                    | C16:1,<br>C18:1,<br>C20:1, | C15Br,<br>C17Br | Present | 2.2                                   | -26.7                                  | -27.7                                  | -0.9                                                             |      |

|    |         |      |                       |    |    |                |       |                                                    |                                     |                 |         |       | C22:1 |       |      |
|----|---------|------|-----------------------|----|----|----------------|-------|----------------------------------------------------|-------------------------------------|-----------------|---------|-------|-------|-------|------|
| 10 | MSD3402 | rim  | jar                   | NA | LH | Post-4.2<br>ka | 9.2   | C14-18; C20,<br>C22, C24; <b>C16</b>               | C18:1,<br>C22:1                     |                 | 1.2     | -23.3 | -24.7 | -1.5  |      |
| 11 | A       | rim  | necked<br>jar         | 15 | LH | Post-4.2<br>ka | 219.3 | C12-C18, C20,<br>C22, C24;<br><b>C16, C18</b>      | C16:1,<br>C18:1,<br>C20:1,<br>C22:1 | C15Br,<br>C17Br | Present | 1.0   | -24.8 | -24.5 | 0.4  |
| 12 | MSD3458 | body | perforate<br>d vessel | NA | LH | Post-4.2<br>ka | 5.8   | C14, C15,<br>C16, C18,<br>C20; <b>C16</b>          | C18:1,<br>C22:1                     |                 |         | 1.1   |       |       |      |
| 13 | MSD3576 | rim  | jar                   | NA | LH | Post-4.2<br>ka | 14.1  | C14-18; C20,<br>C22; <b>C16</b>                    | C16:1,<br>C18:1,<br>C22:1           |                 |         | 1.0   | -30.0 | -30.3 | -0.3 |
| 14 | MSD3585 | rim  | ledged<br>jar         | NA | LH | Post-4.2<br>ka | 63.3  | C12-C18, C20,<br>C22, C24,<br>C26; <b>C16</b>      | C14:1,<br>C16:1,<br>C18:1,<br>C22:1 | C15Br,<br>C17Br | Present | 2.6   | -27.8 | -28.5 | -0.7 |
| 15 | MSD3586 | rim  | ledged<br>jar         | 8  | LH | Post-4.2<br>ka | 66.7  | C12-C26;<br><b>C14, C16,<br/>C18</b>               | C16:1,<br>C18:1,<br>C22:1           | C15Br,<br>C17Br | Present | 1.4   | -15.4 | -19.6 | -4.2 |
| 16 | MSD3587 | rim  | small jar             | 9  | LH | Post-4.2<br>ka | 17.1  | C14-C18, C20,<br>C22, C24; <b>C16</b>              | C16:1,<br>C18:1,<br>C22:1           | C15Br,<br>C17Br | Present | 2.0   | -29.0 | -29.0 | 0.0  |
| 17 | MSD3590 | rim  | jar                   | NA | LH | Post-4.2<br>ka | 8.4   | C14-C18; <b>C16</b>                                | C16:1,<br>C18:1,<br>C22:1           | C15Br,<br>C17Br |         | 2.5   |       |       |      |
| 18 | MSD3602 | rim  | jar                   | NA | LH | Post-4.2<br>ka | 23.9  | C14-C18, C20,<br>C22, C24,<br>C26; <b>C16</b>      | C16:1,<br>C18:1,<br>C22:1           | C15Br,<br>C17Br |         | 2.0   | -29.0 | -30.0 | -1.0 |
| 19 | MSD3603 | rim  | jar                   | NA | LH | Post-4.2<br>ka | 31.0  | C12, C14-C18,<br>C20, C22,<br>C24, C26; <b>C16</b> | C16:1,<br>C18:1,<br>C22:1           | C15Br,<br>C17Br | Present | 1.6   | -25.6 | -24.9 | 0.7  |
| 20 | MSD3788 | rim  | jar                   | NA | LH | Post-4.2<br>ka | 13.5  | C12-C18; <b>C16</b>                                | C16:1,<br>C18:1,<br>C22:1           | C15Br,<br>C17Br | Present | 2.0   | -28.7 | -30.3 | -1.5 |
| 21 | MSD3794 | rim  | jar                   | NA | LH | Post-4.2<br>ka | 20.1  | C12, C14-C18,<br>C20, C22,<br>C24, C26; <b>C16</b> | C16:1,<br>C18:1,<br>C22:1           | C15Br,<br>C17Br | Present | 2.2   | -28.7 | -29.5 | -0.8 |

|    |         |      |                       |     |    |                |      |                                                              |                                     |                 |         |     |       |       |      |
|----|---------|------|-----------------------|-----|----|----------------|------|--------------------------------------------------------------|-------------------------------------|-----------------|---------|-----|-------|-------|------|
| 22 | MSD3795 | rim  | jar                   | NA  | LH | Post-4.2<br>ka | 46.2 | C12-C18, C20,<br>C22, C24,<br>C26; <b>C16,</b><br><b>C18</b> | C14:1,<br>C16:1,<br>C18:1,<br>C22:1 | C15Br,<br>C17Br | Present | 1.4 | -26.7 | -25.6 | 1.2  |
| 23 | MSD3809 | rim  | ledged<br>jar         | 8.5 | LH | Post-4.2<br>ka | 58.7 | C12-C18, C20,<br>C22, C24, C26;<br><b>C16</b>                | C16:1,<br>C18:1,<br>C22:1           | C15Br,<br>C17Br | Present | 1.9 | -23.1 | -21.3 | 1.9  |
| 24 | MSD3810 | rim  | ledged<br>jar         | 10  | LH | Post-4.2<br>ka | 21.0 | C14-C18, C20,<br>C22, C24; <b>C16</b>                        | C16:1,<br>C18:1,<br>C22:1           | C15Br           | Present | 1.1 | -28.3 | -28.6 | -0.3 |
| 25 | MSD3813 | rim  | small jar             | 8   | LH | Post-4.2<br>ka | 13.7 | C14-C18, C20,<br>C22, C24; <b>C16</b>                        | C16:1,<br>C18:1,<br>C22:1           | C15Br,<br>C17Br |         | 1.8 | -29.4 | -29.7 | -0.3 |
| 26 | MSD3816 | rim  | necked<br>jar         | 8   | LH | Post-4.2<br>ka | 8.6  | C12, C14-<br>C18; <b>C16</b>                                 | C18:1,<br>C22:1                     |                 |         | 1.3 |       |       |      |
| 27 | MSD3845 | body | perforate<br>d vessel | NA  | LH | Post-4.2<br>ka | 13.6 | C12-C18; <b>C16</b>                                          | C16:1,<br>C18:1;<br>C22:1           | C15Br,<br>C17Br |         | 3.9 |       |       |      |
| 28 | MSD3846 | body | perforate<br>d vessel | NA  | LH | Post-4.2<br>ka | 21.8 | C14-C18, C20,<br>C22, C24,<br>C26; <b>C16</b>                | C16:1,<br>C18:1,<br>C22:1           | C15Br,<br>C17Br | Present | 1.1 |       |       |      |

•

Table S.5: Details of all analysed vessels from Masudpur VII. Vessel fragments marked with \* had lipid concentrations lower than 5 µg/g and were excluded from analysis.

| S.No. | Sample No. | Trench/Context | Rim/Base/Body | Rim diam | Vessel form            | Image (Exterior surface)                                                              | Image (Interior surface)                                                              |
|-------|------------|----------------|---------------|----------|------------------------|---------------------------------------------------------------------------------------|---------------------------------------------------------------------------------------|
| 1     | MSD 191    | XA1-110        | rim           | 14       | medium jar             |    |    |
| 2     | MSD 192    | XA1-110        | rim           | 14       | medium necked jar      |    |    |
| 3     | MSD 194    | XA1-110        | rim           | 15       | medium jar             |    |    |
| 4     | MSD 198    | XA1-110        | rim           | NA       | jar - rim diam unknown |    |    |
| 5     | MSD 199    | XA1-110        | rim           | 13       | medium jar             |   |   |
| 6     | MSD 200    | XA1-110        | rim           | 12.5     | medium jar             |  |  |
| 7     | MSD 214    | XA1-110        | rim           | 16       | medium jar             |  |  |
| 8     | MSD 215    | XA1-110        | rim           | 12       | medium jar             |  |  |

|    |            |         |     |    |                   |                                                                                       |                                                                                       |
|----|------------|---------|-----|----|-------------------|---------------------------------------------------------------------------------------|---------------------------------------------------------------------------------------|
| 9  | MSD<br>218 | XA1-110 | rim | 18 | large jar         |     |     |
| 10 | MSD<br>259 | XA1-110 | rim | 15 | medium necked jar |    |    |
| 11 | MSD<br>262 | XA1-110 | rim | 14 | medium necked jar |    |    |
| 12 | MSD<br>264 | XA1-110 | rim | 16 | medium necked jar |    |    |
| 13 | MSD<br>266 | XA1-110 | rim | 15 | medium necked jar |    |    |
| 14 | MSD<br>271 | XA1-110 | rim | 28 | large jar         |    |    |
| 15 | MSD<br>273 | XA1-110 | rim | 12 | small jar         |   |   |
| 16 | MSD<br>329 | XA1-110 | rim | 14 | medium necked jar |  |  |
| 17 | MSD<br>343 | XA1-110 | rim | 9  | small jar         |  |  |

|    |             |         |      |      |                        |                                                                                       |                                                                                       |
|----|-------------|---------|------|------|------------------------|---------------------------------------------------------------------------------------|---------------------------------------------------------------------------------------|
| 18 | MSD<br>1326 | XM2-308 | rim  | 10   | small jar              |     |     |
| 19 | MSD<br>1557 | XM2-316 | body | NA   | perforated vessel      |    |    |
| 20 | MSD<br>1597 | XM2-317 | body | NA   | jar - rim diam unknown |    |    |
| 21 | MSD<br>1599 | XM2-317 | rim  | 13   | medium necked jar      |    |    |
| 22 | MSD<br>1601 | XM2-317 | rim  | 12.5 | medium jar             |    |    |
| 23 | MSD<br>1602 | XM2-317 | rim  | 20   | large jar              |   |   |
| 24 | MSD<br>1712 | XM2-321 | rim  | 9.5  | small necked jar       |  |  |
| 25 | MSD<br>221* | x       | base |      | large jar?             |  |  |

|    |              |   |     |                 |
|----|--------------|---|-----|-----------------|
| 26 | MSD<br>258*  | x | rim | large jar       |
| 27 | MSD<br>1387* | x | rim | x               |
| 28 | MSD<br>1562* | x | rim | x               |
| 29 | MSD<br>1598* | x | rim | x               |
| 30 | MSD<br>1600* | x | rim | x               |
| 31 | MSD<br>1710* | x | rim | perforated bowl |

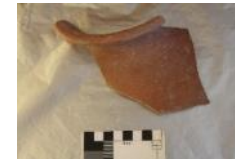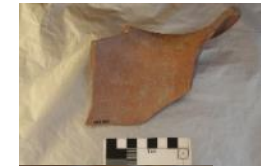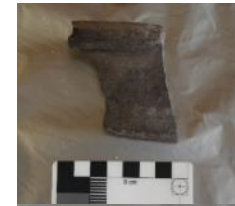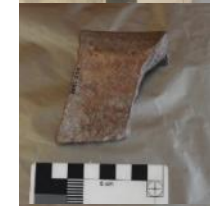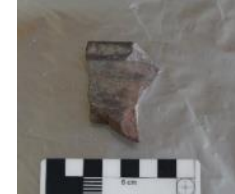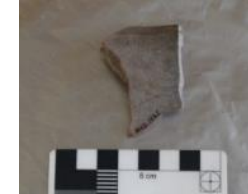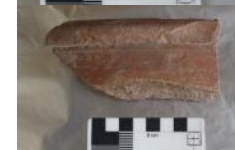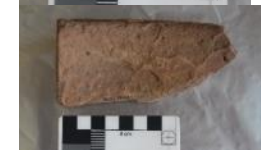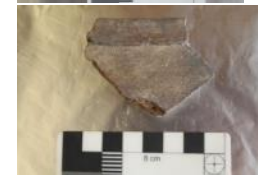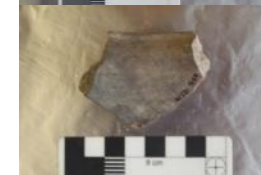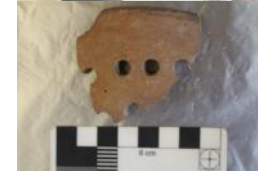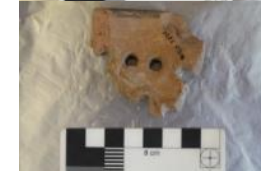



Table S.6: List of analysed samples from Masudpur I with lipid concentrations <5 µg/g. Details of the vessel fragments, chronological period, lipid concentration, lipid composition, P/S ratio and δ<sup>13</sup>C values of the C<sub>18:0</sub>, and C<sub>16:0</sub> fatty acids for every sample are provided. FAs: saturated fatty acids, UFAs: unsaturated fatty acids, Br: branched-chain fatty acids, Diacids: dicarboxylic acids. Fatty acids in bold reflect the compound with the highest abundance within the lipid abstract.

| S.No. | Sample ID | Rim/<br>Base/<br>Body | Vessel<br>forme              | Rim<br>size<br>(cm) | Chrono<br>logical<br>period | Durin<br>g or<br>post-<br>4.2 ka | Lipid<br>concentratio<br>n (µg/g) | Lipid composition                                |                           |                 |         | P/S<br>ratio<br>(C <sub>18:0</sub><br>-<br>C <sub>16:0</sub> ) | δ <sup>13</sup> C<br>C <sub>16:0</sub> | δ <sup>13</sup> C<br>C <sub>18:0</sub> | Δ <sup>13</sup> C<br>(C <sub>18:0</sub> -<br>C <sub>16:0</sub> ) |
|-------|-----------|-----------------------|------------------------------|---------------------|-----------------------------|----------------------------------|-----------------------------------|--------------------------------------------------|---------------------------|-----------------|---------|----------------------------------------------------------------|----------------------------------------|----------------------------------------|------------------------------------------------------------------|
|       |           |                       |                              |                     |                             |                                  |                                   | FAs                                              | UFAs                      | Br              | Diacids |                                                                |                                        |                                        |                                                                  |
| 1     | MSD191    | rim                   | medium<br>jar                | 14                  | LMH                         | During                           | 23.3                              | C12-C18,<br>C20, C22,<br>C24; <b>C16</b>         | C16:1,<br>C18:1,<br>C22:1 | C15Br,<br>C17Br | Present | 2.1                                                            | -27.3                                  | -27.4                                  | -0.2                                                             |
| 2     | MSD192    | rim                   | medium<br>necked jar         | 14                  | LMH                         | During                           | 6.6                               | C14-C18,<br>C20, C22;<br><b>C16</b>              | C16:1,<br>C18:1           |                 |         | 2.0                                                            | -28.1                                  | -28.0                                  | 0.1                                                              |
| 3     | MSD194    | rim                   | medium<br>jar                | 15                  | LMH                         | During                           | 9.1                               | C14-C18;<br><b>C16</b>                           | C16:1,<br>C18:1,<br>C22:1 | C15Br           |         | 1.9                                                            |                                        |                                        |                                                                  |
| 4     | MSD198    | rim                   | jar - rim<br>diam<br>unknown | NA                  | LMH                         | During                           | 7.3                               | C14-C18;<br><b>C16</b>                           | C16:1,<br>C18:1,<br>C22:1 | C15Br           |         | 2.0                                                            |                                        |                                        |                                                                  |
| 5     | MSD199    | rim                   | medium<br>jar                | 13                  | LMH                         | During                           | 79.4                              | C12-C18,<br>C20, C22,<br>C24, C26;<br><b>C16</b> | C16:1,<br>C18:1,<br>C22:1 | C15Br,<br>C17Br |         | 1.5                                                            | -20.4                                  | -19.9                                  | 0.5                                                              |
| 6     | MSD200    | rim                   | medium<br>jar                | 12.5                | LMH                         | During                           | 11.6                              | C12-C18;<br><b>C16</b>                           | C16:1,<br>C18:1,<br>C22:1 |                 |         | 2.0                                                            | -28.4                                  | -28.7                                  | -0.3                                                             |
| 7     | MSD214    | rim                   | medium<br>jar                | 16                  | LMH                         | During                           | 30.1                              | C12-18, C20,<br>C22, C24;<br><b>C16</b>          | C16:1,<br>C18:1,<br>C22:1 | C15Br,<br>C17Br | Present | 2.5                                                            | -28.0                                  | -27.7                                  | 0.4                                                              |
| 8     | MSD215    | rim                   | medium<br>jar                | 12                  | LMH                         | During                           | 5.4                               | C14-C18;<br><b>C16</b>                           | C18:1                     |                 |         | 2.0                                                            |                                        |                                        |                                                                  |
| 9     | MSD218    | rim                   | large jar                    | 18                  | LMH                         | During                           | 57.7                              | C14-C18,<br>C20, C22,<br>C24; <b>C16</b>         | C16:1,<br>C18:1,<br>C22:1 | C15Br,<br>C17Br | Present | 2.5                                                            | -27.7                                  | -27.0                                  | 0.7                                                              |
| 10    | MSD259    | rim                   | medium<br>jar                | 15                  | LMH                         | During                           | 8.4                               | C14-C18,<br>C20; <b>C16</b>                      | C16:1,<br>C18:1,<br>C22:1 | C15Br,<br>C17Br |         | 2.2                                                            |                                        |                                        |                                                                  |

|    |         |      |                        |      |     |        |       |                                              |                     |              |         |     |       |       |      |
|----|---------|------|------------------------|------|-----|--------|-------|----------------------------------------------|---------------------|--------------|---------|-----|-------|-------|------|
| 11 | MSD262  | rim  | medium necked jar      | 14   | LMH | During | 8.5   | C14-C18, C20, C22; <b>C16</b>                | C16:1, C18:1        | C17Br        |         | 1.4 |       |       |      |
| 12 | MSD264  | rim  | medium necked jar      | 16   | LMH | During | 24.6  | C12-C18, C20, C22, C24; <b>C16</b>           | C16:1, C18:1, C22:1 | C17Br        | Present | 1.5 | -30.3 | -30.3 | 0.0  |
| 13 | MSD266  | rim  | medium necked jar      | 15   | LMH | During | 5.4   | C14, C16, C18; <b>C16</b>                    | C16:1, C18:1, C22:1 |              |         | 1.9 |       |       |      |
| 14 | MSD271  | rim  | large jar              | 28   | LMH | During | 5.0   | C16, C18; <b>C16</b>                         | C18:1, C22:1        |              |         | 0.8 |       |       |      |
| 15 | MSD273  | rim  | small jar              | 12   | LMH | During | 15.8  | C12-C18, C20, C22, C24; <b>C16</b>           | C16:1, C18:1, C22:1 | C15Br        | Present | 1.5 | -29.8 | -30.3 | -0.5 |
| 16 | MSD329  | rim  | medium necked jar      | 14   | LMH | During | 38.3  | C12-C18, C20; <b>C16, C18</b>                | C16:1, C18:1,       | C15Br, C17Br | Present | 1.2 | -14.7 | -18.7 | -4.1 |
| 17 | MSD343  | rim  | small jar              | 9    | LMH | During | 122.6 | C12-C18, C20, C22, C24, C26, C28; <b>C16</b> | C16:1, C18:1, C22:1 | C15Br, C17Br | Present | 1.2 | -22.4 | -22.6 | -0.2 |
| 18 | MSD1326 | rim  | small jar              | 10   | LMH | During | 23.5  | C12-C18, C20, C22, 24; <b>C16</b>            | C16:1, C18:1        | C15Br        | Present | 1.7 | -26.7 | -27.3 | -0.6 |
| 19 | MSD1557 | body | perforated vessel      | NA   | LMH | During | 23.3  | C15-C18, C20, C22; <b>C18</b>                | C18:1, C22:1        |              | Present | 0.8 | -29.2 | -29.3 | -0.1 |
| 20 | MSD1597 | body | jar - rim diam unknown | NA   | LMH | During | 13.0  | C14, C16, C18, C20; <b>C16</b>               | C16:1, C18:1, C22:1 |              | Present | 1.4 | -29.5 | -29.6 | -0.1 |
| 21 | MSD1599 | rim  | medium necked jar      | 13   | LMH | During | 5.5   | C14-C18; <b>C16</b>                          | C16:1, C18:1, C22:1 |              |         | 2.0 |       |       |      |
| 22 | MSD1601 | rim  | medium jar             | 12.5 | LMH | During | 14.0  | C12-C18; <b>C16</b>                          | C16:1, C18:1, C22:1 | C15Br        | Present | 1.4 |       |       |      |
| 23 | MSD1602 | rim  | large jar              | 20   | LMH | During | 10.1  | C12, C14-C18; <b>C16</b>                     | C16:1, C18:1        | C15Br, C17Br | Present | 2.4 |       |       |      |
| 24 | MSD1712 | rim  | small necked jar       | 9.5  | EMH | Before | 10.2  | C14-C18, C20, C22; <b>C16</b>                | C16:1, C18:1, C22:1 |              | Present | 1.2 | -28.2 | -27.0 | 1.2  |

Table S.7: Details of all analysed vessels from Lohari Ragho I. Vessel fragments marked with \* had lipid concentrations lower than 5 µg/g and were excluded from analysis.

| <i>S.No.</i> | <i>Sample No.</i> | <i>Trench/Context</i> | <i>Rim/Base/Body</i> | <i>Rim diam</i> | <i>Vessel form</i>      | <i>Image<br/>(Exterior surface)</i>                                                   | <i>Image<br/>(Interior surface)</i>                                                   |
|--------------|-------------------|-----------------------|----------------------|-----------------|-------------------------|---------------------------------------------------------------------------------------|---------------------------------------------------------------------------------------|
| 1            | LHR03             | EA-511                | rim                  | 8.5             | small globular jar      |    |    |
| 2            | LHR06             | EA-511                | rim                  | 9               | small globular jar      |    |    |
| 3            | LHR07             | EA-511                | rim                  | 12.5            | medium globular jar     |    | x                                                                                     |
| 4            | LHR09             | EA-520                | rim                  | NA              | jar - rim diam unknown  |    | x                                                                                     |
| 5            | LHR10             | EA-520                | rim                  | 26              | large jar               |   |   |
| 6            | LHR11             | EA-520                | rim                  | NA              | large jar               |  |  |
| 7            | LHR12             | EA-520                | body                 | NA              | large perforated vessel |  |  |

|    |        |        |      |    |                         |                                                                                       |                                                                                       |
|----|--------|--------|------|----|-------------------------|---------------------------------------------------------------------------------------|---------------------------------------------------------------------------------------|
| 8  | LHR13  | EA-520 | rim  | NA | jar - rim diam unknown  |     |     |
| 9  | LHR21  | EA-520 | rim  | 16 | medium jar              |    |    |
| 10 | LHR25  | EA-525 | rim  | 12 | small jar               |    |    |
| 11 | LHR26  | EA-520 | rim  | 16 | medium jar              |    |    |
| 12 | LHR27  | EA-520 | rim  | 9  | small necked jar        |    |    |
| 13 | LHR29  | EA-522 | base | NA | jar - rim diam unknown  | x                                                                                     | x                                                                                     |
| 14 | LHR36  | EA-553 | body | NA | jar - rim diam unknown  | x                                                                                     | x                                                                                     |
| 15 | LHR38  | EA-553 | body | NA | large perforated vessel | x                                                                                     | x                                                                                     |
| 16 | LHR40  | EA-553 | rim  | 18 | large jar               | x                                                                                     | x                                                                                     |
| 17 | LHR14* | EA-520 | body | NA | perforated jar          |  | x                                                                                     |
| 18 | LHR15* | EA-520 | rim  | 22 | large jar               |  |  |

|    |        |        |                 |    |                  |                                                                                      |                                                                                      |
|----|--------|--------|-----------------|----|------------------|--------------------------------------------------------------------------------------|--------------------------------------------------------------------------------------|
| 19 | LHR16* | EA-520 | terracotta cake |    |                  |    | x                                                                                    |
| 20 | LHR17* | EA-520 | body            | NA | perforated jar   |   |   |
| 21 | LHR20* | EA-520 | rim             | 28 | large necked jar |   |   |
| 22 | LHR22* | EA-524 | body            | NA | jar?             |   |   |
| 23 | LHR23* | EA-524 | rim             | 10 | small jar        |   |   |
| 24 | LHR24* | EA-520 | rim             | 32 | ledged jar       |  |  |
| 25 | LHR32* | x      | rim             | 21 | large jar        | x                                                                                    | x                                                                                    |
| 26 | LHR33* | x      | rim             | 40 | dish             | x                                                                                    | x                                                                                    |

Table S.8: List of analysed samples from Lohari Ragho I with lipid concentrations <5 µg/g. Details of the vessel fragments, chronological period, lipid concentration, lipid composition, P/S ratio and δ<sup>13</sup>C values of the C<sub>18:0</sub>, and C<sub>16:0</sub> fatty acids for every sample are provided. FAs: saturated fatty acids, UFAs: unsaturated fatty acids, Br: branched-chain fatty acids, Diacids: dicarboxylic acids. Fatty acids in bold reflect the compound with the highest abundance within the lipid abstract.

| S.No. | Sample ID | Rim/<br>Base/<br>Body | Vessel<br>shape               | Rim<br>size<br>(cm) | Chronolo<br>gical<br>period | Before,<br>during<br>or<br>post-<br>4.2 ka | Lipid<br>concentration<br>(µg/g) | Lipid composition                                                                    |                                     |                                     |                            | P/S<br>ratio<br>(C <sub>18:0</sub> -<br>C <sub>16:0</sub> ) | δ <sup>13</sup> C<br>C <sub>16:0</sub> | δ <sup>13</sup> C<br>C <sub>18:0</sub> | Δ <sup>13</sup> C<br>(C <sub>18:0</sub> -<br>C <sub>16:0</sub> ) |
|-------|-----------|-----------------------|-------------------------------|---------------------|-----------------------------|--------------------------------------------|----------------------------------|--------------------------------------------------------------------------------------|-------------------------------------|-------------------------------------|----------------------------|-------------------------------------------------------------|----------------------------------------|----------------------------------------|------------------------------------------------------------------|
|       |           |                       |                               |                     |                             |                                            |                                  | FAs                                                                                  | UFAs                                | Br                                  | Diacids                    |                                                             |                                        |                                        |                                                                  |
| 1     | LHR03     | rim                   | small<br>globular<br>jar      | 8.5                 | EMH                         | Before                                     | 44.6                             | C12, C14-C18,<br>C20; <b>C16, C18</b>                                                | C16:1,<br>C18:1,<br>C22:1           |                                     |                            | 0.8                                                         | -30.7                                  | -30.7                                  | 0.1                                                              |
| 2     | LHR06     | rim                   | small<br>globular<br>jar      | 9                   | EMH                         | Before                                     | 5.9                              | C12, C14, C16,<br>C18; <b>C16</b>                                                    | C16:1,<br>C18:1,<br>C22:1           |                                     |                            | 1.8                                                         |                                        |                                        |                                                                  |
| 3     | LHR07     | rim                   | medium<br>globular<br>jar     | 12.5                | EMH                         | Before                                     | 34.6                             | C14-C18, C20,<br>C22, C24; <b>C16,</b><br><b>C18</b>                                 | C16:1,<br>C18:1,<br>C22:1           | C15Br,<br>C17Br                     | Present                    | 0.9                                                         | -28.3                                  | -28.8                                  | -0.5                                                             |
| 4     | LHR09     | rim                   | jar - rim<br>diam<br>unknown  | NA                  | LMH                         | Post-<br>4.2 ka                            | 29.9                             | C12, C14-C18,<br>C20, C22, C24;<br><b>C16, C18</b>                                   | C16:1,<br>C18:1,<br>C22:1           |                                     |                            | 0.8                                                         | -29.3                                  | -29.9                                  | -0.6                                                             |
| 5     | LHR10     | rim                   | large jar                     | 26                  | LMH                         | Post-<br>4.2 ka                            | 214.7                            | C12-C24<br>(including C13,<br>C15, C17, C19,<br>C21, C23); <b>C18,</b><br><b>C16</b> | C16:1,<br>C18:1,<br>C20:1,<br>C22:1 | C13Br,<br>C15Br,<br>C17Br,<br>C19Br | Present<br>(C7, C8,<br>C9) | 1.0                                                         | -14.2                                  | -15.1                                  | -0.9                                                             |
| 6     | LHR11     | rim                   | large jar                     | NA                  | LMH                         | Post-<br>4.2 ka                            | 24.3                             | C14-C18, C20,<br>C22, C23, C24,<br>C25, C26; <b>C16</b>                              | C16:1,<br>C18:1,<br>C20:1,<br>C22:1 | C17Br                               |                            | 1.2                                                         | -23.0                                  | -24.3                                  | -1.3                                                             |
| 7     | LHR12     | body                  | large<br>perforated<br>vessel | NA                  | LMH                         | Post-<br>4.2 ka                            | 16.4                             | C14-C18, C20,<br>C22, C24, C26;<br><b>C18</b>                                        | C16:1,<br>C18:1,<br>C20:1,<br>C22:1 | C15Br,<br>C17Br                     |                            | 0.8                                                         | -30.2                                  | -30.7                                  | -0.5                                                             |
| 8     | LHR13     | rim                   | jar - rim<br>diam<br>unknown  | NA                  | LMH                         | Post-<br>4.2 ka                            | 27.3                             | C14-C18, C20,<br>C22, C24, C25,<br>C26, C28; <b>C16</b>                              | C16:1,<br>C18:1,<br>C20:1,<br>C22:1 | C15Br,<br>C17Br                     | Present                    | 1.0                                                         | -24.9                                  | -24.7                                  | 0.2                                                              |

|    |       |      |                         |    |     |             |      |                                              |                     |     |       |       |      |
|----|-------|------|-------------------------|----|-----|-------------|------|----------------------------------------------|---------------------|-----|-------|-------|------|
| 9  | LHR21 | rim  | medium jar              | 16 | LMH | Post-4.2 ka | 9.0  | C14, C16, C18, C20, C22; <b>C16, C18</b>     | C18:1               | 1.0 |       |       |      |
| 10 | LHR25 | rim  | small jar               | 12 | LMH | Post-4.2 ka | 19.2 | C16, C18, C20; <b>C18</b>                    | C18:1               | 0.7 | -31.0 | -31.2 | -0.2 |
| 11 | LHR26 | rim  | medium jar              | 16 | LMH | Post-4.2 ka | 21.1 | C14-C18, C20, C22; <b>C18</b>                | C18:1               | 0.7 | -18.8 | -19.2 | -0.4 |
| 12 | LHR27 | rim  | small necked jar        | 9  | LMH | Post-4.2 ka | 17.2 | C16, C18, C20; <b>C18</b>                    | C16:1, C18:1, C22:1 | 0.7 | -31.2 | -31.3 | 0.0  |
| 13 | LHR29 | base | jar - rim diam unknown  | NA | LMH | Post-4.2 ka | 5.6  | C16, C18; <b>C16</b>                         | C18:1               | 0.8 |       |       |      |
| 14 | LHR36 | body | jar - rim diam unknown  | NA | LMH | Post-4.2 ka | 10.7 | C14, C16-C18, C20, C22, C24; <b>C18</b>      | C18:1, C22:1        | 1.0 |       |       |      |
| 15 | LHR38 | body | large perforated vessel | NA | LMH | Post-4.2 ka | 12.9 | C14-C18, C20, C22, C24, C26, C28; <b>C16</b> | C18:1, C20:1, C22:1 | 1.0 | -27.8 | -27.7 | 0.0  |
| 16 | LHR40 | rim  | large jar               | 18 | LMH | Post-4.2 ka | 22.0 | C14-C18, C20, C22; <b>C16</b>                | C16:1, C18:1, C22:1 | 1.0 | -15.5 | -17.2 | -1.7 |

Table S.9: Details of all analysed vessels from Khanak. Vessel fragments marked with \* had lipid concentrations lower than 5 µg/g and were excluded from analysis.

| <i>S.No.</i> | <i>Sample No.</i> | <i>Trench/Context</i> | <i>Rim/Base/Body</i> | <i>Rim diameter</i> | <i>Vessel form</i> | <i>Image (Interior)</i>                                                               | <i>Image (Exterior)</i>                                                               |
|--------------|-------------------|-----------------------|----------------------|---------------------|--------------------|---------------------------------------------------------------------------------------|---------------------------------------------------------------------------------------|
| 1            | KNK01             | A05-502               | base                 | NA                  | jar?               | x                                                                                     |  |
| 2            | KNK02             | A05-502               | rim                  | 5                   | small jar          |  |  |

|   |        |         |      |      |            |                                                                                      |                                                                                      |
|---|--------|---------|------|------|------------|--------------------------------------------------------------------------------------|--------------------------------------------------------------------------------------|
| 3 | KNK11  | A05-510 | rim  | NA   | small jar  |    |    |
| 4 | KNK18  | A05-510 | base | NA   | large jar  |   |   |
| 5 | KNK03* | A05-502 | rim  | 13   | bowl       |   |   |
| 6 | KNK04* | A05-502 | rim  | 14   | medium jar |   |   |
| 7 | KNK05* | A05-502 | rim  | 13.5 | medium jar |   |   |
| 8 | KNK06* | A05-507 | body | NA   | large jar  |  |  |



Table S.10: List of analysed samples from Khanak with lipid concentrations <5 µg/g. Details of the vessel fragments, chronological period, lipid concentration, lipid composition, P/S ratio and  $\delta^{13}\text{C}$  values of the  $\text{C}_{18:0}$ , and  $\text{C}_{16:0}$  fatty acids for every sample are provided. FAs: saturated fatty acids, UFAs: unsaturated fatty acids, Br: branched-chain fatty acids, Diacids: dicarboxylic acids. Fatty acids in bold reflect the compound with the highest abundance within the lipid abstract.

| S.No. | Sample ID | Rim/<br>Base/<br>Body | Vessel<br>shape | Rim<br>size<br>(cm) | Chronological<br>period | Before,<br>during or<br>post-4.2<br>ka | Lipid<br>concentrat<br>ion (µg/g) | Lipid composition                                      |                                     |                 |                 | P/S<br>ratio<br>( $\text{C}_{16:0}/$<br>$\text{C}_{18:0}$ ) | $\delta^{13}\text{C}$<br>$\text{C}_{16:0}$ | $\delta^{13}\text{C}$<br>$\text{C}_{18:0}$ | $\Delta^{13}\text{C}$<br>( $\text{C}_{18:0}-$<br>$\text{C}_{16:0}$ ) |
|-------|-----------|-----------------------|-----------------|---------------------|-------------------------|----------------------------------------|-----------------------------------|--------------------------------------------------------|-------------------------------------|-----------------|-----------------|-------------------------------------------------------------|--------------------------------------------|--------------------------------------------|----------------------------------------------------------------------|
|       |           |                       |                 |                     |                         |                                        |                                   | FAs                                                    | UFAs                                | Br              | Diacids         |                                                             |                                            |                                            |                                                                      |
| 1     | KNK01     | base                  | small jar       | NA                  | LMH                     | During                                 | 18.2                              | C14-C22,<br>C24; <b>C16</b> ,<br><b>C18</b>            | C16:1,<br>C18:1                     | C17Br           |                 | 1.0                                                         | -18.5                                      | -21.6                                      | -3.0                                                                 |
| 2     | KNK02     | rim                   | small jar       | 5                   | LMH                     | During                                 | 131.0                             | C14-C18,<br>C20, C22;<br><b>C18</b>                    | C16:1,<br>C18:1                     | C15Br,<br>C17Br | Present         | 1.2                                                         | -15.3                                      | -16.0                                      | -0.7                                                                 |
| 3     | KNK11     | rim                   | small jar       | NA                  | EMH                     | Before                                 | 39.2                              | C14-C28<br>(including<br>odd-chain<br>FAs); <b>C16</b> | C16:1,<br>C18:1;<br>C20:1,<br>C22:1 | C15Br,<br>C17Br | Present:<br>C18 | 1.0                                                         | -28.0                                      | -28.5                                      | -0.5                                                                 |
| 4     | KNK18     | base                  | large jar       | NA                  | EMH                     | Before                                 | 8.1                               | C14-C18,<br>C20, C22;<br><b>C16</b>                    | C16:1,<br>C18:1,<br>C20:1,<br>C22:1 | C15Br,<br>C17Br |                 | 1.4                                                         |                                            |                                            |                                                                      |

Table S.11: Details of all analysed vessels from Farmana. Vessel fragments marked with \* had lipid concentrations lower than 5 µg/g and were excluded from analysis

| <i>S.No.</i> | <i>Sample No.</i> | <i>Trench/Context</i>              | <i>Rim/Base/Body</i> | <i>Rim diam</i> | <i>Vessel form</i> | <i>Image (Exterior surface)</i>                                                       | <i>Image (Interior surface)</i>                                                       |
|--------------|-------------------|------------------------------------|----------------------|-----------------|--------------------|---------------------------------------------------------------------------------------|---------------------------------------------------------------------------------------|
| 1            | FRN04             | 3Y17-9023                          | neck                 | NA              | small jar          |    |    |
| 2            | FRN09             | 1G7-9022<br>(Complex 3)            | rim                  | 14.5            | medium jar         |    |    |
| 3            | FRN10             | 1G7-9022<br>(Complex 3)            | rim                  | 20              | large jar          |    |    |
| 4            | FRN11             | 1G7-9022<br>(Complex 3)            | body                 | NA              | perforated vessel  |    |    |
| 5            | FRN13             | 1B3-8004<br>(Main Street)          | rim                  | 8.5             | small jar          |   |   |
| 6            | FRN14             | 1G3-8007<br>(Outside<br>Complex 4) | rim                  | 19.5            | large jar          |  |  |
| 7            | FRN15             | 1D5-8007<br>(Complex 3)            | rim                  | 9.5             | small jar          |  |  |

|    |       |                                    |      |    |                   |                                                                                       |                                                                                       |
|----|-------|------------------------------------|------|----|-------------------|---------------------------------------------------------------------------------------|---------------------------------------------------------------------------------------|
| 8  | FRN16 | 1D5-8007<br>(Complex 3)            | body | NA | perforated vessel |     |     |
| 9  | FRN17 | 1D5-8007<br>(Complex 3)            | body | NA | perforated vessel |    |    |
| 10 | FRN18 | 1B3-8004<br>(Main Street)          | rim  | 6  | small ledged jar  |    |    |
| 11 | FRN19 | 1G3-8007<br>(Outside<br>Complex 4) | rim  | 16 | medium jar        |    |    |
| 12 | FRN20 | 1G3-8007<br>(Outside<br>Complex 4) | rim  | 7  | small jar         |    |    |
| 13 | FRN21 | 1E3-8005<br>(Complex 3)            | rim  | 7  | small jar         |   |   |
| 14 | FRN24 | 1E3-8005<br>(Complex 3)            | rim  | 8  | small jar         |  |  |
| 15 | FRN25 | 1B5-8002<br>(Complex 3)            | rim  | 17 | medium bowl       |  |  |

|    |        |                                    |      |     |                           |                                                                                       |                                                                                       |
|----|--------|------------------------------------|------|-----|---------------------------|---------------------------------------------------------------------------------------|---------------------------------------------------------------------------------------|
| 16 | FRN26  | 1C6-8003<br>(Complex 3)            | body | NA  | jar - rim diam<br>unknown |     |     |
| 17 | FRN34  | 1G3-8007<br>(Outside<br>Complex 4) | rim  | 8   | small jar                 |    |    |
| 18 | FRN35  | 1E3-8005<br>(Complex 3)            | rim  | 10  | small jar                 |    |    |
| 19 | FRN02* | 1C8-09021<br>(Inside Complex 3)    | body | NA  | jar-rim diam unknown      |    |    |
| 20 | FRN08* | 1G7-9022<br>(Complex 3)            | rim  | 5.5 | small jar                 |    |    |
| 21 | FRN12* | 1D5-8008<br>(Complex 3)            | rim  | 21  | large jar                 |   |   |
| 22 | FRN22* | 1E3-8005<br>(Complex 3)            | rim  | 11  | small jar                 |  |  |
| 23 | FRN23* | 1D3-8008<br>(Complex 3)            | rim  | 8.5 | small jar                 |  |  |

|    |        |                                 |      |      |                   |
|----|--------|---------------------------------|------|------|-------------------|
| 24 | FRN27* | 1D3-8008<br>(Complex 3)         | body | NA   | jar?              |
| 25 | FRN28* | 1G4-8005<br>(Lane No. 2)        | body | NA   | perforated        |
| 26 | FRN29* | 1G3-8007<br>(Outside Complex 4) | rim  | 20   | bowl              |
| 27 | FRN30* | 1E3-8005<br>(Complex 3)         | body | NA   | jar?              |
| 28 | FRN31* | 1G7-9022<br>(Inside Complex 3)  | rim  | 15.5 | bowl              |
| 29 | FRN32* | 1D3-8008<br>(Complex 3)         | body | NA   | perforated vessel |
| 30 | FRN33* | 1G4-8005<br>(Lane No. 2)        | rim  | 8.5  | small jar         |

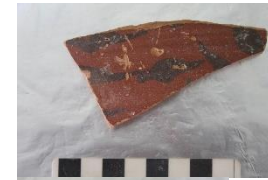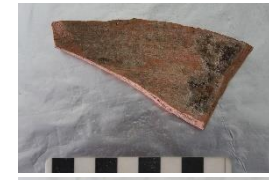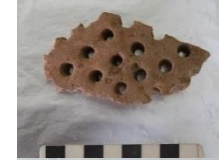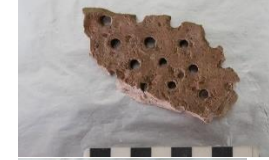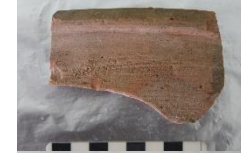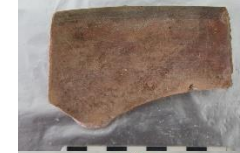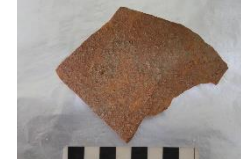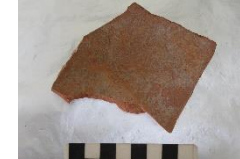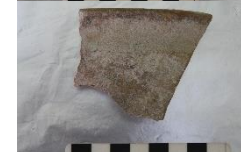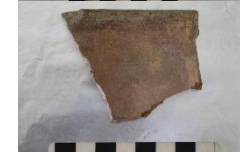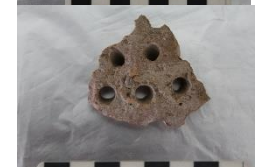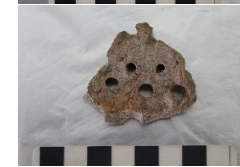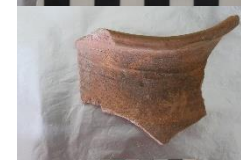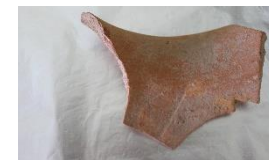

Table S.12: List of analysed samples from Farmana with lipid concentrations <5 µg/g. Details of the vessel fragments, chronological period, lipid concentration, lipid composition, P/S ratio and δ<sup>13</sup>C values of the C<sub>18:0</sub>, and C<sub>16:0</sub> fatty acids for every sample are provided. FAs: saturated fatty acids, UFAs: unsaturated fatty acids, Br: branched-chain fatty acids, Diacids: dicarboxylic acids. Fatty acids in bold reflect the compound with the highest abundance within the lipid abstract.

| S.No | Sample ID | Rim/ Base/ Body | Vessel forme      | Rim size (cm) | Chronol o gical period | Before , during or post-4.2 ka | Lipid concentration (µg/g) | Lipid composition                       |                                                |              |              | P/S ratio (C <sub>16:0</sub> /C <sub>18:0</sub> ) | δ <sup>13</sup> C C <sub>16:0</sub> | δ <sup>13</sup> C C <sub>18:0</sub> | Δ <sup>13</sup> C (C <sub>18:0</sub> -C <sub>16:0</sub> ) |
|------|-----------|-----------------|-------------------|---------------|------------------------|--------------------------------|----------------------------|-----------------------------------------|------------------------------------------------|--------------|--------------|---------------------------------------------------|-------------------------------------|-------------------------------------|-----------------------------------------------------------|
|      |           |                 |                   |               |                        |                                |                            | FAs                                     | UFAs                                           | Br           | Diacids      |                                                   |                                     |                                     |                                                           |
| 1    | FRN04     | neck            | small jar         | NA            | EMH                    | Before                         | 14.0                       | C14-C18; <b>C16</b>                     | unmethylated C18:1                             | C15Br, C17Br |              | 1.7                                               | -16.0                               | -19.8                               | -3.8                                                      |
| 2    | FRN09     | rim             | medium jar        | 14.5          | EMH                    | Before                         | 41.4                       | C12, C14-C18, C20, C22; <b>C16</b>      | C16:1, C18:1, C20:1                            | C15Br, C17Br |              | 1.0                                               | -19.3                               | -20.2                               | -0.9                                                      |
| 3    | FRN10     | rim             | large jar         | 20            | EMH                    | Before                         | 7.9                        | C14-C18; <b>C16</b>                     | C18:1                                          |              |              | 1.8                                               |                                     |                                     |                                                           |
| 4    | FRN11     | body            | perforated vessel | NA            | EMH                    | Before                         | 23.6                       | C12, C14-C18, C20; <b>C16</b>           | C16:1, C18:1, C22:1                            |              |              | 1.2                                               | -27.0                               | -30.0                               | -3.0                                                      |
| 5    | FRN13     | rim             | small jar         | 8.5           | EMH                    | Before                         | 12.3                       | C12, C14-C18, C20, C22; C24 <b>C16</b>  | C16:1, C18:1                                   | C17Br        |              | 1.1                                               | -28.2                               | -27.9                               | 0.3                                                       |
| 6    | FRN14     | rim             | large jar         | 19.5          | EMH                    | Before                         | 17.6                       | C12, C14-C18, C20, C22, C24; <b>C16</b> | C16:1, C18:1; unmethylated C18:1, C20:1, C22:1 | C17Br        |              | 1.1                                               | -26.2                               | -25.9                               | 0.3                                                       |
| 7    | FRN15     | rim             | small jar         | 9.5           | EMH                    | Before                         | 6.1                        | C14-C18; <b>C16</b>                     | C16:1, C18:1                                   | C17Br        |              | 1.4                                               |                                     |                                     |                                                           |
| 8    | FRN16     | body            | perforated vessel | NA            | EMH                    | Before                         | 9.8                        | C12, C14-C18; <b>C16</b>                | C16:1, C18:1, unmethylated C18:1               |              | Present: C14 | 2.3                                               |                                     |                                     |                                                           |
| 9    | FRN17     | body            | perforated vessel | NA            | EMH                    | Before                         | 10.4                       | C12-C18; <b>C16</b>                     | C18:1                                          |              | Present: C14 | 2.8                                               |                                     |                                     |                                                           |

|    |       |      |                        |    |     |        |      |                                    |                            |              |              |     |       |       |      |
|----|-------|------|------------------------|----|-----|--------|------|------------------------------------|----------------------------|--------------|--------------|-----|-------|-------|------|
| 10 | FRN18 | rim  | small ledged jar       | 6  | EMH | Before | 45.6 | C12-C18, C20, C22, C24; <b>C18</b> | C16:1, C18:1, C20:1        | C15Br, C17Br | Present: C10 | 1.2 | -20.2 | -23.0 | -2.8 |
| 11 | FRN19 | rim  | medium jar             | 16 | EMH | Before | 5.3  | C14, C16, C18; <b>C16</b>          | C18:1                      |              |              | 2.6 |       |       |      |
| 12 | FRN20 | rim  | small jar              | 7  | EMH | Before | 6.9  | C15-C18; <b>C16</b>                | C16:1, C18:1               | C17Br        | Present: C14 | 1.6 |       |       |      |
| 13 | FRN21 | rim  | small jar              | 7  | EMH | Before | 8.7  | C14-C18, C20, C22, C24; <b>C16</b> | C16:1, C18:1               |              |              | 1.2 |       |       |      |
| 14 | FRN24 | rim  | small jar              | 8  | EMH | Before | 7.1  | C14-C18, C20; <b>C16</b>           | C16:1, C18:1               |              |              | 1.3 |       |       |      |
| 15 | FRN25 | rim  | medium bowl            | 17 | EMH | Before | 9.0  | C14-C18, C20, C22, C24; <b>C16</b> | C16:1, C18:1, C18:1, C20:1 |              |              | 1.2 |       |       |      |
| 16 | FRN26 | body | jar - rim diam unknown | NA | EMH | Before | 9.7  | C14-C18, C20; <b>C16</b>           | C16:1, C18:1, C22:1        | C17Br        |              | 3.5 | -25.3 | -26.4 | -1.1 |
| 17 | FRN34 | rim  | small jar              | 8  | EMH | Before | 19.2 | C14-C18; <b>C16</b>                | C16:1, C18:1               |              |              | 1.2 |       |       |      |
| 18 | FRN35 | rim  | small jar              | 10 | EMH | Before | 6.1  | C14-C18; <b>C16</b>                | C16:1, C18:1               |              |              | 1.7 |       |       |      |

Table S.13: Details of all analysed vessels from Rakhigarhi. Vessel fragments marked with \* had lipid concentrations lower than 5 µg/g and were excluded from analysis

| <i>S.No.</i> | <i>Sample No.</i> | <i>Trench-Context</i> | <i>Rim/Base/Body</i> | <i>Rim diam</i> | <i>Vessel type</i> | <i>Image (Interior)</i>                                                               | <i>Image (Exterior)</i>                                                               |
|--------------|-------------------|-----------------------|----------------------|-----------------|--------------------|---------------------------------------------------------------------------------------|---------------------------------------------------------------------------------------|
| 1            | RGR01             | 4.1E-140031           | rim                  | 8               | small ledged jar   |    |    |
| 2            | RGR02             | 4.1E-140030           | rim                  | 5               | small ledged jar   |    |    |
| 3            | RGR03             | 4.1E-140025           | rim                  | 8               | small ledged jar   |    |    |
| 4            | RGR04             | 4.1E-140031           | rim                  | 12              | small jar          |   |   |
| 5            | RGR05             | 4.1E-140035           | rim                  | 16              | medium jar         |  |  |
| 6            | RGR06             | 4.1F-15034            | rim                  | 7               | small jar          |  |  |
| 7            | RGR15             | 4.1B-14011            | body                 | NA              | perforated vessel  |  |  |



|    |       |            |      |    |    |                   |                                                                                       |                                                                                       |
|----|-------|------------|------|----|----|-------------------|---------------------------------------------------------------------------------------|---------------------------------------------------------------------------------------|
| 8  | RGR16 | 4.1B-14011 | rim  |    | 19 | large dish        |     |     |
| 9  | RGR17 | 4.1B-14002 | rim  |    | 11 | small jar         |    |    |
| 10 | RGR20 | 4.1B-14003 | rim  |    | 5  | very small jar    |    |    |
| 11 | RGR21 | 4.1F-14038 | rim  |    | 16 | medium jar        |    |    |
| 12 | RGR22 | 4.1F-14038 | body | NA |    | perforated vessel |    |    |
| 13 | RGR23 | 4.1F-14038 | body | NA |    | perforated vessel |   |   |
| 14 | RGR24 | 4.1F-14038 | rim  |    | 10 | small necked jar  |  |  |

|    |         |            |      |    |      |            |
|----|---------|------------|------|----|------|------------|
| 15 | RGR25   | 4.1F-14049 | rim  |    | 13   | medium jar |
| 16 | RGR27   | 4.1F-14038 | rim  |    | 8    | small jar  |
| 17 | RGR29   | 4.1E-14004 | neck | NA |      | medium jar |
| 18 | RGR30   | 4.1E-14005 | body | NA |      | large jar? |
| 19 | RGR07*  | 4.1F-15034 | rim  |    | 12   | dish       |
| 20 | RGR08*  | 4.1F-15034 | rim  | NA |      | ledged jar |
| 21 | RGR09*  | 4.1F-15034 | rim  |    | 12.5 | jar        |
| 22 | RGR010* | 4.1F-15034 | rim  |    | 10   | ledged jar |

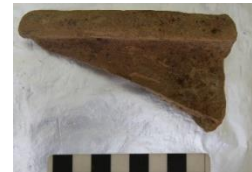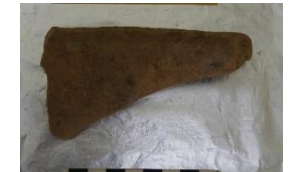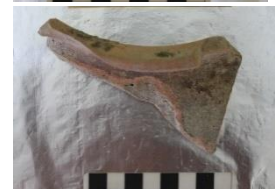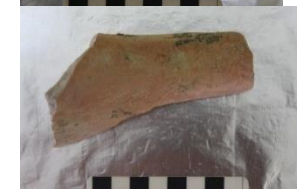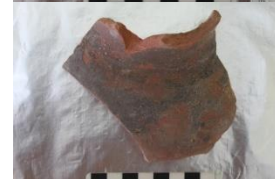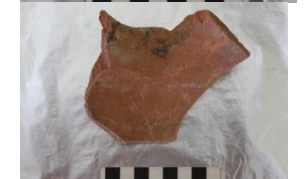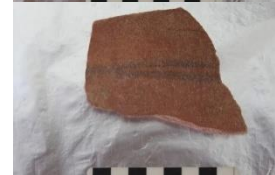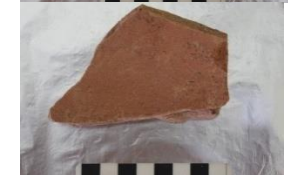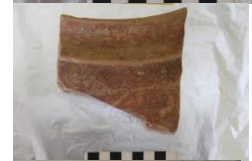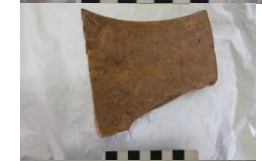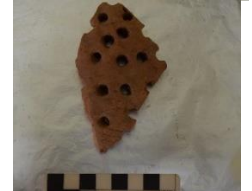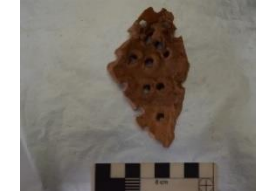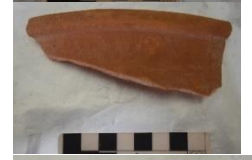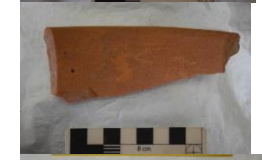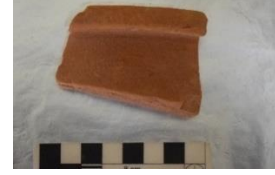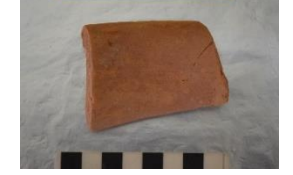

|    |        |            |      |    |    |                   |
|----|--------|------------|------|----|----|-------------------|
| 23 | RGR11* | 4.1F-15034 | rim  |    | 11 | necked jar        |
| 24 | RGR12* | 4.1F-15034 | rim  |    | 12 | jar               |
| 25 | RGR13* | 4.1F-15034 | rim  |    | 8  | jar               |
| 26 | RGR14* | 4.1B-14003 | rim  |    | 15 | jar               |
| 27 | RGR18* | 4.1B-14002 | rim  |    | 9  | jar               |
| 28 | RGR19* | 4.1B-14002 | body | NA |    | perforated vessel |
| 29 | RGR26* | 4.1B-14011 | body | NA |    | perforated vessel |

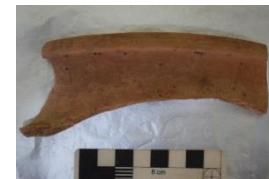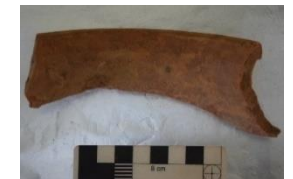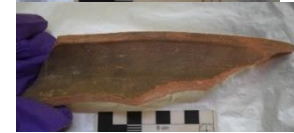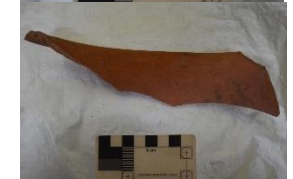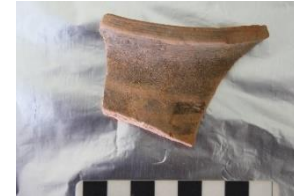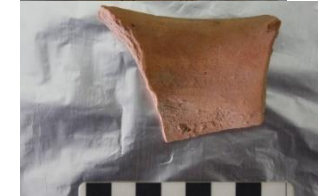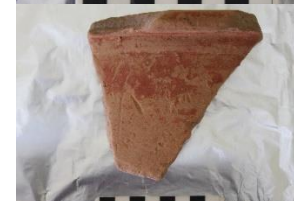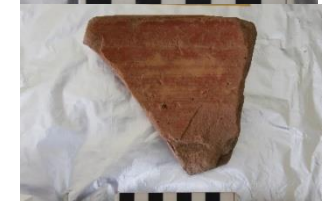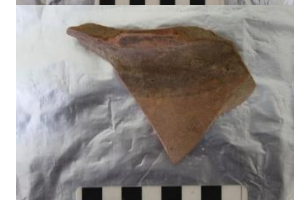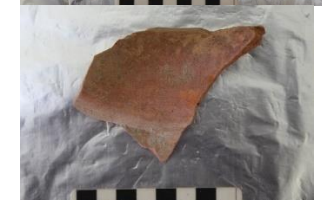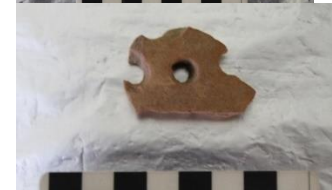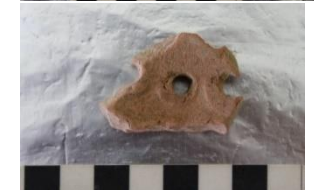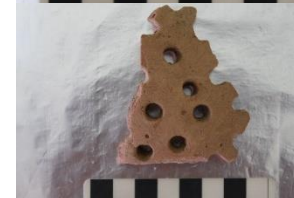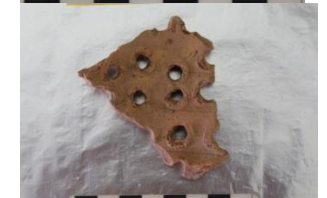

30

RGR28\*

4.1F-14049

rim

6 small jar

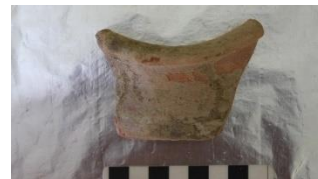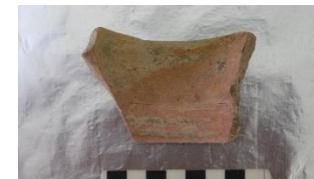

Table S.14: List of analysed samples from Rakhigarhi with lipid concentrations <5 µg/g. Details of the vessel fragments, chronological period, lipid concentration, lipid composition, P/S ratio and δ<sup>13</sup>C values of the C<sub>18:0</sub>, and C<sub>16:0</sub> fatty acids for every sample are provided. FAs: saturated fatty acids, UFAs: unsaturated fatty acids, Br: branched-chain fatty acids, Diacids: dicarboxylic acids. Fatty acids in bold reflect the compound with the highest abundance within the lipid abstract.

| S.No. | Sample ID | Rim/<br>Base/<br>Body | Vessel form             | Rim size (cm) | Chronological period | Before, during or post-4.2 ka | Lipid concentration (µg/g) | Lipid composition                                           |                     |              |             | P/S ratio (C <sub>18:0</sub> -C <sub>16:0</sub> ) | δ <sup>13</sup> C C <sub>16:0</sub> | δ <sup>13</sup> C C <sub>18:0</sub> | Δ <sup>13</sup> C (C <sub>18:0</sub> -C <sub>16:0</sub> ) |
|-------|-----------|-----------------------|-------------------------|---------------|----------------------|-------------------------------|----------------------------|-------------------------------------------------------------|---------------------|--------------|-------------|---------------------------------------------------|-------------------------------------|-------------------------------------|-----------------------------------------------------------|
|       |           |                       |                         |               |                      |                               |                            | FAs                                                         | UFAs                | Br           | Diacids     |                                                   |                                     |                                     |                                                           |
| 1     | RGR01     | rim                   | small ledged jar        | 8             | EMH                  | Before                        | 21.9                       | C14-C18, C24; <b>C18</b>                                    | C16:1, C18:1        |              |             | 2.0                                               | -26.9                               | -26.7                               | 0.1                                                       |
| 2     | RGR02     | rim                   | small ledged jar        | 8             | EMH                  | Before                        | 16.6                       | C14-C18, C20, C22; <b>C16</b>                               | C16:1, C18:1        | C15Br, C17Br | Present: C9 | 1.5                                               | -26.0                               | -26.8                               | -0.8                                                      |
| 3     | RGR03     | rim                   | small ledged jar        | 8             | EMH                  | Before                        | 18.9                       | C12, C14-C18, C20, C22, C24; <b>C16</b>                     | C16:1, C18:1        | C17Br        |             | 1.3                                               | -24.7                               | -21.2                               | 3.4                                                       |
| 4     | RGR04     | rim                   | small jar               | 9             | EMH                  | Before                        | 11.6                       | C14, C15, C16, C18; <b>C16</b>                              | C18:1               |              | Present: C9 | 2.2                                               |                                     |                                     |                                                           |
| 5     | RGR05     | rim                   | large jar               | 19.5          | EMH                  | Before                        | 8.5                        | C12, C14, C16, C18; <b>C16</b>                              | C18:1               |              |             | 3.5                                               |                                     |                                     |                                                           |
| 6     | RGR06     | rim                   | small jar               | 7             | EMH                  | Before                        | 23.6                       | C12, C14-C16, C18, C20, C22, C23, C24, C25, C26; <b>C16</b> | C16:1, C18:1, C22:1 |              |             | 1.0                                               |                                     |                                     |                                                           |
| 7     | RGR15     | body                  | large perforated vessel | NA            | EMH                  | Before                        | 5.1                        | C14-C18; <b>C16</b>                                         | C18:1, C22:1        |              |             | 2.9                                               |                                     |                                     |                                                           |
| 8     | RGR16     | rim                   | large dish              | 19            | EMH                  | Before                        | 8.2                        | C14-C18, C20, C22, C24; <b>C16</b>                          | C16:1, C18:1        |              |             | 1.5                                               |                                     |                                     |                                                           |
| 9     | RGR017    | rim                   | small jar               | 11            | EMH                  | Before                        | 9.5                        | C14-C18; <b>C16</b>                                         | C18:1               | C17Br        |             | 1.2                                               | -25.8                               | -25.3                               | 0.5                                                       |

|    |        |      |                   |    |     |        |      |                                                           |                    |              |             |     |       |       |      |
|----|--------|------|-------------------|----|-----|--------|------|-----------------------------------------------------------|--------------------|--------------|-------------|-----|-------|-------|------|
| 10 | RGR020 | rim  | very small jar    | 5  | EMH | Before | 36.7 | C14-C26 (including all odd-chain fatty acids); <b>C16</b> | C16:1, C18:1       | C15Br, C17Br | Present: C9 | 1.0 | -16.0 | -19.5 | -3.4 |
| 11 | RGR021 | rim  | medium jar        | 16 | EMH | Before | 17.1 | C14-C18; C20, C22, C24; <b>C16</b>                        | C16:1, C18:1       |              | Present: C9 | 1.2 |       |       |      |
| 12 | RGR022 | body | perforated vessel | NA | EMH | Before | 6.6  | C14, C15, C16, C18; <b>C16</b>                            | C18:1              |              |             | 1.0 |       |       |      |
| 13 | RGR023 | body | perforated vessel | NA | EMH | Before | 11.8 | C16, C18; <b>C16</b>                                      |                    |              |             | 2.3 |       |       |      |
| 14 | RGR024 | rim  | small necked jar  | 10 | EMH | Before | 48.8 | C14-C26 (including odd-chain fatty acids); <b>C22</b>     | C16:1, C18:1,      |              |             | 0.8 | -28.6 | -26.5 | 2.2  |
| 15 | RGR025 | rim  | medium jar        | 13 | EMH | Before | 7.2  | C14, C16, C18, C20, C22, C24, C26; <b>C16</b>             | C16:1, C18:1       |              |             | 1.2 |       |       |      |
| 16 | RGR027 | rim  | small jar         | 8  | EMH | Before | 11.7 | C14-C18, C20, C22, C24; <b>C16, C18</b>                   | C16:1, C18:, C20:1 |              |             | 1.1 |       |       |      |
| 17 | RGR029 | neck | medium jar        | NA | EMH | Before | 12.6 | C14-C18, C20, C22, C24; <b>C16</b>                        | C16:1, C18:, C20:1 |              |             | 1.2 | -28.9 | -29.0 | -0.1 |
| 18 | RGR030 | body | large jar         | NA | EMH | Before | 5.9  | C14-C18, C20, C22, C24; <b>C18</b>                        | C16:1, C18:1       |              |             | 1.0 |       |       |      |

Table S.15: Details and lipid concentrations and composition of vessels excluded from analysis.

| <i>Sample ID</i> | <i>Chronology details</i> | <i>Rim/base/body</i> | <i>Rim diam (cm)</i> | <i>Vessel form</i> | <i>Lipid concentration (µg/g)</i> |
|------------------|---------------------------|----------------------|----------------------|--------------------|-----------------------------------|
| ALM121-385       | LH                        | body                 | NA                   | Jar?               | 3.1                               |
| FRN02            | EMH                       | body                 | NA                   | NA                 | 1.7                               |
| FRN08            | EMH                       | rim                  | 5.5                  | Small jar          | 4.1                               |
| FRN12            | EMH                       | rim                  | 21                   | Large jar          | 4.2                               |
| FRN22            | EMH                       | rim                  | 11                   | Small jar          | 2.8                               |
| FRN23            | EMH                       | rim                  | 7.5                  | Small jar          | 3.8                               |
| FRN27            | EMH                       | body                 | NA                   | Jar?               | 1.9                               |
| FRN28            | EMH                       | body                 | NA                   | Perforated         | 2.7                               |
| FRN29            | EMH                       | rim                  | 20                   | Big bowl           | 2.6                               |
| FRN30            | EMH                       | body                 | NA                   | Jar?               | 4.9                               |
| FRN31            | EMH                       | rim                  | 15.5                 | Medium bowl        | 0.2                               |
| FRN32            | EMH                       | body                 | NA                   | Perforated         | 3.1                               |
| FRN33            | EMH                       | rim                  | 8.5                  | Small jar          | 2.4                               |
| KNK03            | LMH                       | rim                  | 13                   | Medium bowl        | 1.0                               |

|        |     |                 |      |                  |     |
|--------|-----|-----------------|------|------------------|-----|
| KNK04  | EMH | rim             | 14   | Medium jar       | 1.2 |
| KNK05  | EMH | rim             | 13.5 | Medium jar       | 1.3 |
| KNK06  | EMH | body            | NA   | Large jar        | 3.8 |
| KNK16  | EH? | rim             | 19   | Large jar        | 0.8 |
| LHR08  | LMH | terracotta cake | NA   | NA               | 1.3 |
| LHR14  | LMH | body            | NA   | Perforated       | 0.8 |
| LHR15  | LMH | rim             | 22   | Large jar        | 1.6 |
| LHR16  | LMH | terracotta cake | NA   | NA               | 0.8 |
| LHR17  | LMH | body            | NA   | Perforated       | 0.7 |
| LHR20  | LMH | rim             | 28   | Large necked jar | 0.8 |
| LHR22  | LMH | rim             | NA   | Jar?             | 2.5 |
| LHR23  | LMH | rim             | 10   | Small jar        | 1.0 |
| LHR24  | LMH | rim             | 32   | Large ledged jar | 0.4 |
| LHR32  | EMH | rim             | 21   | Large jar        | 2.7 |
| LHR33  | EMH | rim             | 40   | Large dish       | 1.1 |
| MSD221 | LMH | base            | NA   | Jar?             | 3.7 |



|          |     |     |      |                  |     |
|----------|-----|-----|------|------------------|-----|
| MSD258   | LMH | rim | 15   | Medium jar       | 4.6 |
| MSD1387  | LMH | rim | 29   | Large jar/vat    | 1.8 |
| MSD1562A | LMH | rim | 18   | Large jar        | 3.1 |
| MSD1598  | LMH | rim | 35   | Large jar/vat    | 2.9 |
| MSD1600  | LMH | rim | 18   | Large jar        | 1.2 |
| MSD1710  | EMH | rim | 15   | Perforated bowl  | 2.9 |
| MSD3410  | LH  | rim | NA   | ledged jar       | 4.4 |
| RGR07    | EMH | rim | 12   | Small dish       | 5.0 |
| RGR08    | EMH | rim | NA   | ledged jar       | 3.3 |
| RGR09    | EMH | rim | 12.5 | Small jar        | 3.3 |
| RGR10    | EMH | rim | 10   | Small ledged jar | 1.0 |
| RGR11    | EMH | rim | 11   | Small necked jar | 3.2 |
| RGR12    | EMH | rim | 12   | Small jar        | 4.9 |
| RGR13    | EMH | rim | 8    | Small jar        | 1.1 |
| RGR14    | EMH | rim | 15   | Medium jar       | 3.4 |
| RGR18    | EMH | rim | 9    | Small jar        | 4.2 |

|       |     |      |    |            |     |
|-------|-----|------|----|------------|-----|
| RGR19 | EMH | rim  | NA | Perforated | 1.6 |
| RGR26 | EMH | body | NA | Perforated | 2.7 |
| RGR28 | EMH | rim  | 6  | Small jar  | 4.0 |
